# Supplementary material
Source: PubMed Central journal article supplement (PMC4846918)
Supplement: ajtr0008-0688-f3.pdf [file ajtr0008-0688-f3.pdf]

rs2200733 is related to AF relapse after ablation

**Supplementary Table 1.** Nucleotide sequences for primers used to sequence both atrial fibrillation associated variants

| Variants  | Primers | Nucleotide Sequence (5'-3') |
|-----------|---------|-----------------------------|
| rs2200733 | Forward | CTTGGTGGTACTTGGGTTTTG       |
|           | Reverse | TGCATTTATTCACAGGCTCC        |
| rs2106261 | Forward | GCCCTAGTCCAGAGAGAGCAGTC     |
|           | Reverse | TAGCTTAGCACCCCACAGATAGAG    |

**Supplementary Table 2.** Association between rs2106261 and diameters of atrium and pulmonary veins

| Clinical Parameters | Genotypes (M ± SD, mm) |          |          | Inherent Models (P <sub>-value</sub> ) |           |          |
|---------------------|------------------------|----------|----------|----------------------------------------|-----------|----------|
|                     | AA                     | AG       | GG       | Additive                               | Recessive | Dominant |
| LA                  | 41.3±5.8               | 41.4±5.1 | 41.7±4.7 | 0.339                                  | 0.850     | 0.651    |
| RA                  | 38.1±6.0               | 37.8±5.2 | 38.7±5.2 | 0.591                                  | 0.893     | 0.507    |
| LSPV                | 20.1±3.9               | 19.8±3.2 | 19.7±4.9 | 0.830                                  | 0.607     | 0.909    |
| LIPV                | 17.5±2.8               | 16.4±2.7 | 16.7±3.1 | 0.236                                  | 0.110     | 0.964    |
| RSPV                | 20.4±4.6               | 20.1±3.6 | 21.1±4.1 | 0.472                                  | 0.795     | 0.227    |
| RIPV                | 18.2±3.8               | 17.8±3.3 | 18.0±2.8 | 0.763                                  | 0.675     | 0.684    |

LA, left atrium; LIPV, left inferior pulmonary vein; LSPV, left superior pulmonary vein; M ± SD, mean ± standard deviation; RA, right atrium; RIPV, right inferior pulmonary vein; RSPV, right superior pulmonary vein.
